# Supplementary material for: Exploiting CRISPR-Cas to manipulate Enterococcus faecalis populations
Source: eLife. 2017 Jun 23;6:e26664. doi: 10.7554/eLife.26664 (PMC5491264; doi:10.7554/eLife.26664)
Supplement: Figure 5—source data 1. — OD600nm values for each individual replicate are provided, which are shown in Figure 5—figure supplement 1. DOI: http://dx.doi.org/10.7554/eLife.26664.013 [file elife-26664-fig5-data1.xlsx]

## Sheet: pKH12 pKHS67 BHI
Time (Hrs)	V583 pKH12						V583 pKHS67						V649 pKH12						V649 pKHS67
0	0	0	0.002	0	0.001	0.004	0	0	0.001	0.004	0.003	0.002	0.003	0	0	0.004	0.001	0.002	0.002	0.001	0.001	0.004	0	0
0.5	0	0	0.004	0	0.001	0	-0.001	0	0	0.002	0.003	0.002	0.002	0	0	0.011	0	0.002	0.002	0.001	0.001	0.004	0	0
1	0	0	0.005	0	0	0.001	0.001	0.002	0.002	0.004	0.006	0.005	0.005	0.004	0.001	0.017	0.005	0.002	0.002	0	0.001	0.004	0	0
1.5	0	0	0.006	0	0.001	0.001	0.003	0.022	0.014	0.005	0.011	0.014	0.041	0.033	0.004	0.044	0.031	0.004	0.004	0.001	0.002	0.006	0.001	0.002
2	0.001	0.001	0.007	0.002	0.001	0.002	0.022	0.043	0.036	0.02	0.03	0.036	0.068	0.061	0.03	0.073	0.059	0.006	0.017	0.002	0.005	0.008	0.002	0.005
2.5	0.005	0.002	0.01	0.006	0.003	0.004	0.04	0.061	0.054	0.035	0.045	0.053	0.091	0.086	0.054	0.094	0.082	0.009	0.034	0.005	0.013	0.029	0.004	0.012
3	0.015	0.005	0.015	0.016	0.005	0.007	0.056	0.079	0.071	0.051	0.061	0.07	0.115	0.112	0.077	0.117	0.102	0.016	0.054	0.012	0.033	0.053	0.009	0.027
3.5	0.033	0.013	0.026	0.037	0.013	0.014	0.078	0.099	0.094	0.07	0.08	0.089	0.145	0.143	0.108	0.144	0.128	0.03	0.082	0.029	0.077	0.079	0.02	0.058
4	0.069	0.029	0.046	0.077	0.026	0.029	0.107	0.125	0.122	0.094	0.104	0.11	0.188	0.184	0.155	0.18	0.158	0.061	0.116	0.064	0.161	0.113	0.044	0.114
4.5	0.132	0.058	0.081	0.145	0.052	0.057	0.154	0.166	0.163	0.13	0.138	0.14	0.251	0.24	0.231	0.237	0.206	0.117	0.18	0.129	0.297	0.167	0.088	0.201
5	0.223	0.11	0.134	0.24	0.101	0.109	0.225	0.23	0.219	0.188	0.19	0.19	0.341	0.322	0.314	0.317	0.279	0.207	0.26	0.219	0.449	0.245	0.155	0.308
5.5	0.333	0.186	0.201	0.343	0.174	0.185	0.313	0.314	0.299	0.263	0.267	0.264	0.436	0.413	0.414	0.407	0.378	0.314	0.365	0.323	0.582	0.342	0.241	0.418
6	0.438	0.276	0.273	0.456	0.26	0.267	0.41	0.407	0.398	0.35	0.353	0.359	0.534	0.505	0.528	0.505	0.49	0.435	0.484	0.449	0.695	0.454	0.333	0.506
6.5	0.572	0.367	0.359	0.571	0.349	0.357	0.508	0.501	0.513	0.436	0.444	0.461	0.619	0.607	0.632	0.601	0.607	0.532	0.59	0.548	0.727	0.558	0.409	0.55
7	0.664	0.461	0.467	0.652	0.427	0.445	0.606	0.593	0.646	0.521	0.518	0.562	0.685	0.731	0.689	0.649	0.691	0.596	0.657	0.575	0.752	0.61	0.449	0.57
7.5	0.68	0.523	0.576	0.673	0.483	0.521	0.688	0.678	0.741	0.587	0.584	0.644	0.712	0.786	0.717	0.694	0.727	0.628	0.687	0.584	0.787	0.634	0.474	0.607
8	0.707	0.553	0.617	0.714	0.509	0.554	0.733	0.72	0.767	0.625	0.617	0.683	0.763	0.812	0.754	0.731	0.749	0.665	0.716	0.606	0.818	0.661	0.508	0.656
8.5	0.778	0.592	0.653	0.771	0.537	0.606	0.782	0.755	0.797	0.681	0.652	0.721	0.802	0.862	0.78	0.773	0.785	0.686	0.756	0.63	0.845	0.711	0.534	0.69
9	0.82	0.634	0.704	0.794	0.57	0.644	0.826	0.798	0.837	0.742	0.692	0.753	0.807	0.896	0.803	0.786	0.809	0.679	0.795	0.645	0.856	0.745	0.551	0.725
9.5	0.843	0.653	0.723	0.82	0.586	0.663	0.82	0.811	0.861	0.757	0.724	0.768	0.802	0.9	0.805	0.784	0.811	0.671	0.807	0.655	0.889	0.756	0.559	0.754
10	0.859	0.662	0.724	0.847	0.598	0.653	0.816	0.807	0.862	0.76	0.743	0.776	0.797	0.905	0.814	0.784	0.807	0.667	0.82	0.662	0.925	0.76	0.566	0.785
10.5	0.854	0.669	0.733	0.87	0.6	0.65	0.813	0.798	0.859	0.769	0.761	0.783	0.799	0.908	0.82	0.787	0.813	0.667	0.829	0.67	0.938	0.769	0.568	0.813
11	0.87	0.683	0.737	0.867	0.602	0.647	0.818	0.797	0.852	0.765	0.775	0.778	0.803	0.919	0.833	0.794	0.819	0.669	0.838	0.679	0.935	0.775	0.57	0.845
11.5	0.867	0.692	0.749	0.878	0.608	0.645	0.826	0.793	0.847	0.775	0.782	0.771	0.808	0.924	0.845	0.801	0.819	0.68	0.849	0.687	0.942	0.78	0.572	0.863
12	0.881	0.705	0.75	0.906	0.611	0.645	0.836	0.794	0.843	0.779	0.792	0.769	0.819	0.948	0.862	0.814	0.83	0.689	0.869	0.697	0.955	0.787	0.577	0.867
12.5	0.881	0.712	0.771	0.93	0.618	0.649	0.848	0.796	0.845	0.787	0.808	0.765	0.829	0.959	0.878	0.827	0.837	0.704	0.877	0.706	0.963	0.796	0.577	0.877
13	0.862	0.72	0.765	0.948	0.619	0.654	0.866	0.804	0.851	0.8	0.822	0.766	0.843	0.976	0.888	0.831	0.842	0.709	0.889	0.715	0.947	0.799	0.587	0.867
13.5	0.892	0.73	0.75	0.968	0.622	0.662	0.875	0.812	0.851	0.807	0.837	0.769	0.853	0.98	0.886	0.842	0.855	0.717	0.901	0.72	0.953	0.818	0.593	0.865
14	0.899	0.741	0.797	0.981	0.634	0.672	0.892	0.823	0.865	0.818	0.847	0.772	0.861	0.992	0.904	0.85	0.863	0.731	0.911	0.728	0.92	0.825	0.604	0.843
14.5	0.897	0.743	0.816	0.997	0.658	0.68	0.904	0.835	0.876	0.828	0.866	0.778	0.869	0.999	0.911	0.849	0.873	0.741	0.923	0.727	0.89	0.828	0.608	0.846
15	0.893	0.755	0.798	1.009	0.669	0.687	0.912	0.847	0.89	0.837	0.872	0.788	0.868	1.014	0.914	0.852	0.87	0.743	0.926	0.74	0.88	0.839	0.606	0.807
15.5	0.865	0.75	0.818	1.006	0.67	0.694	0.92	0.857	0.895	0.847	0.883	0.795	0.875	1.01	0.919	0.854	0.868	0.753	0.931	0.738	0.814	0.843	0.606	0.799
16	0.879	0.764	0.819	1.027	0.672	0.7	0.928	0.866	0.896	0.851	0.89	0.8	0.881	1.014	0.929	0.86	0.875	0.754	0.927	0.745	0.805	0.851	0.606	0.791
16.5	0.83	0.772	0.815	1.031	0.675	0.703	0.935	0.872	0.901	0.856	0.895	0.804	0.884	1.018	0.924	0.861	0.881	0.759	0.915	0.737	0.786	0.853	0.602	0.771
17	0.824	0.761	0.833	1.037	0.68	0.703	0.94	0.874	0.906	0.86	0.9	0.804	0.88	1.025	0.924	0.865	0.875	0.765	0.923	0.744	0.762	0.86	0.604	0.764
17.5	0.826	0.776	0.832	1.013	0.686	0.704	0.945	0.88	0.903	0.863	0.907	0.806	0.884	1.029	0.916	0.868	0.878	0.771	0.928	0.747	0.757	0.865	0.606	0.777
18	0.824	0.773	0.838	1.002	0.692	0.709	0.942	0.885	0.91	0.868	0.908	0.81	0.882	1.033	0.923	0.865	0.884	0.773	0.938	0.753	0.739	0.868	0.605	0.777
18.5	0.809	0.785	0.838	0.991	0.698	0.71	0.941	0.891	0.922	0.868	0.909	0.812	0.881	1.037	0.928	0.867	0.887	0.773	0.941	0.758	0.728	0.873	0.605	0.769
19	0.793	0.791	0.844	0.974	0.705	0.715	0.95	0.895	0.917	0.871	0.913	0.815	0.881	1.045	0.93	0.869	0.893	0.778	0.945	0.763	0.709	0.873	0.611	0.762
19.5	0.805	0.801	0.851	0.98	0.711	0.717	0.955	0.896	0.914	0.876	0.916	0.819	0.885	1.048	0.935	0.872	0.89	0.785	0.946	0.761	0.684	0.864	0.617	0.771
20	0.8	0.815	0.828	0.981	0.713	0.719	0.959	0.898	0.933	0.877	0.916	0.82	0.889	1.054	0.934	0.876	0.889	0.792	0.941	0.77	0.668	0.856	0.618	0.79

## Sheet: pKH12 pKHS67 +cam
Time (Hrs)	V583 pKH12						V583 pKHS67						V649 pKH12						V649 pKHS67
0	-0.001	-0.002	0	-0.001	-0.001	0	0	0.002	-0.002	-0.001	-0.001	-0.002	-0.001	-0.002	-0.002	-0.001	-0.001	-0.001	0.001	0	0.002	-0.001	0	-0.001
0.5	-0.001	-0.002	-0.001	-0.001	-0.001	0	0	0.002	-0.002	-0.001	-0.002	-0.002	-0.001	-0.002	-0.001	-0.001	-0.001	-0.002	0.003	0	0.002	-0.001	0	-0.001
1	-0.001	-0.001	-0.001	-0.001	-0.001	0	0	0.002	-0.002	-0.001	-0.001	-0.002	0	-0.002	-0.001	-0.001	-0.001	-0.001	0.004	0.001	0.002	-0.001	0	-0.001
1.5	0	-0.001	-0.001	0	-0.001	0	0	0.002	-0.002	0	0	0	0	-0.002	-0.001	0.001	0	0.004	0.001	0	0.002	0	0	0
2	0.001	-0.001	-0.001	0.001	0	0	0.001	0.003	-0.001	0.001	0.014	0.019	0.001	-0.001	0	0.015	0.014	0.024	0.001	0.001	0.002	0.015	0	0
2.5	0.003	0.001	0	0.003	0.001	0.001	0.002	0.004	-0.001	0.002	0.03	0.034	0.003	0	0.001	0.033	0.028	0.042	0.001	0.001	0.003	0.029	0	0.001
3	0.009	0.004	0.002	0.008	0.004	0.003	0.004	0.005	0	0.005	0.043	0.049	0.006	0.003	0.005	0.05	0.041	0.062	0.002	0.001	0.003	0.042	0	0.002
3.5	0.023	0.009	0.007	0.018	0.009	0.007	0.009	0.008	0.002	0.01	0.058	0.061	0.013	0.009	0.012	0.07	0.063	0.082	0.002	0.002	0.005	0.054	0.001	0.003
4	0.047	0.02	0.016	0.036	0.02	0.015	0.018	0.014	0.006	0.022	0.076	0.077	0.025	0.021	0.024	0.093	0.078	0.104	0.002	0.002	0.007	0.067	0.001	0.004
4.5	0.092	0.041	0.033	0.072	0.038	0.03	0.035	0.026	0.014	0.044	0.097	0.097	0.049	0.043	0.047	0.124	0.101	0.14	0.003	0.004	0.01	0.077	0.002	0.005
5	0.162	0.079	0.063	0.133	0.073	0.058	0.067	0.049	0.03	0.084	0.131	0.126	0.09	0.084	0.09	0.178	0.131	0.2	0.004	0.006	0.013	0.087	0.004	0.008
5.5	0.255	0.139	0.11	0.217	0.128	0.105	0.117	0.089	0.061	0.151	0.184	0.166	0.146	0.145	0.157	0.25	0.185	0.272	0.005	0.009	0.017	0.097	0.006	0.011
6	0.36	0.222	0.181	0.319	0.201	0.17	0.186	0.148	0.112	0.237	0.263	0.226	0.213	0.217	0.238	0.333	0.275	0.354	0.008	0.012	0.024	0.107	0.009	0.015
6.5	0.481	0.304	0.263	0.44	0.275	0.24	0.261	0.219	0.191	0.317	0.353	0.305	0.284	0.287	0.32	0.415	0.369	0.448	0.011	0.016	0.031	0.114	0.013	0.018
7	0.629	0.385	0.356	0.578	0.353	0.329	0.349	0.295	0.262	0.414	0.452	0.384	0.366	0.357	0.416	0.515	0.484	0.517	0.015	0.021	0.046	0.122	0.019	0.026
7.5	0.721	0.508	0.477	0.666	0.429	0.447	0.441	0.375	0.337	0.504	0.537	0.48	0.459	0.435	0.476	0.596	0.568	0.575	0.024	0.031	0.071	0.135	0.029	0.038
8	0.733	0.562	0.576	0.691	0.496	0.53	0.512	0.436	0.411	0.566	0.61	0.574	0.516	0.503	0.508	0.636	0.62	0.615	0.039	0.046	0.118	0.144	0.044	0.059
8.5	0.766	0.571	0.608	0.726	0.519	0.568	0.565	0.473	0.469	0.606	0.64	0.638	0.545	0.54	0.538	0.676	0.657	0.642	0.064	0.072	0.185	0.162	0.072	0.093
9	0.806	0.596	0.637	0.788	0.543	0.602	0.612	0.507	0.502	0.648	0.671	0.679	0.593	0.571	0.562	0.714	0.677	0.664	0.106	0.114	0.255	0.189	0.12	0.143
9.5	0.845	0.639	0.674	0.822	0.579	0.634	0.644	0.551	0.554	0.677	0.707	0.72	0.611	0.613	0.557	0.719	0.712	0.669	0.175	0.163	0.325	0.231	0.189	0.183
10	0.864	0.651	0.681	0.846	0.595	0.633	0.647	0.581	0.594	0.676	0.726	0.749	0.6	0.626	0.573	0.713	0.702	0.659	0.256	0.222	0.419	0.288	0.285	0.239
10.5	0.886	0.653	0.682	0.87	0.599	0.63	0.634	0.583	0.608	0.68	0.73	0.746	0.604	0.616	0.562	0.713	0.699	0.662	0.335	0.3	0.501	0.356	0.385	0.31
11	0.907	0.652	0.677	0.877	0.592	0.619	0.631	0.597	0.605	0.689	0.739	0.747	0.619	0.615	0.575	0.728	0.707	0.667	0.444	0.389	0.608	0.442	0.502	0.384
11.5	0.93	0.658	0.679	0.895	0.597	0.612	0.637	0.597	0.605	0.685	0.732	0.754	0.635	0.625	0.583	0.745	0.719	0.679	0.558	0.488	0.669	0.547	0.61	0.452
12	0.913	0.666	0.677	0.917	0.604	0.618	0.646	0.599	0.605	0.702	0.744	0.765	0.659	0.647	0.596	0.759	0.741	0.687	0.621	0.589	0.671	0.641	0.668	0.524
12.5	0.931	0.672	0.686	0.913	0.612	0.609	0.652	0.61	0.606	0.714	0.745	0.761	0.668	0.656	0.606	0.776	0.758	0.697	0.647	0.63	0.698	0.697	0.711	0.579
13	0.927	0.674	0.692	0.91	0.62	0.621	0.663	0.617	0.604	0.716	0.753	0.771	0.685	0.664	0.614	0.779	0.78	0.706	0.658	0.668	0.732	0.705	0.714	0.632
13.5	0.924	0.686	0.696	0.904	0.63	0.623	0.673	0.633	0.602	0.73	0.759	0.794	0.703	0.666	0.614	0.792	0.79	0.705	0.677	0.696	0.783	0.739	0.735	0.722
14	0.921	0.7	0.703	0.877	0.64	0.637	0.68	0.648	0.616	0.734	0.772	0.8	0.71	0.671	0.614	0.796	0.798	0.716	0.691	0.708	0.752	0.758	0.761	0.739
14.5	0.92	0.718	0.706	0.877	0.648	0.638	0.695	0.657	0.628	0.744	0.782	0.818	0.716	0.679	0.616	0.805	0.81	0.716	0.691	0.708	0.788	0.782	0.779	0.726
15	0.907	0.727	0.73	0.877	0.656	0.656	0.705	0.664	0.641	0.754	0.799	0.831	0.714	0.704	0.636	0.819	0.817	0.73	0.687	0.698	0.729	0.791	0.774	0.721
15.5	0.879	0.733	0.737	0.866	0.667	0.665	0.714	0.679	0.657	0.76	0.807	0.837	0.714	0.733	0.637	0.826	0.823	0.728	0.676	0.675	0.72	0.786	0.761	0.658
16	0.851	0.755	0.751	0.876	0.671	0.671	0.73	0.684	0.668	0.764	0.814	0.85	0.709	0.731	0.654	0.837	0.837	0.737	0.663	0.66	0.675	0.785	0.736	0.704
16.5	0.841	0.758	0.748	0.859	0.677	0.669	0.738	0.695	0.667	0.769	0.822	0.854	0.715	0.722	0.655	0.839	0.837	0.739	0.648	0.655	0.729	0.78	0.714	0.758
17	0.806	0.778	0.751	0.833	0.688	0.678	0.742	0.703	0.671	0.769	0.833	0.864	0.721	0.713	0.66	0.847	0.836	0.747	0.635	0.658	0.744	0.777	0.697	0.773
17.5	0.773	0.796	0.768	0.822	0.69	0.676	0.747	0.714	0.682	0.77	0.834	0.865	0.72	0.715	0.665	0.85	0.841	0.751	0.626	0.663	0.768	0.775	0.678	0.794
18	0.773	0.811	0.762	0.811	0.693	0.684	0.759	0.718	0.684	0.772	0.841	0.87	0.759	0.72	0.669	0.859	0.851	0.746	0.625	0.66	0.768	0.783	0.668	0.779
18.5	0.755	0.802	0.771	0.781	0.697	0.683	0.761	0.724	0.678	0.787	0.844	0.871	0.755	0.746	0.668	0.861	0.852	0.742	0.629	0.662	0.741	0.787	0.659	0.77
19	0.739	0.83	0.807	0.764	0.709	0.682	0.769	0.735	0.678	0.793	0.849	0.872	0.75	0.745	0.67	0.863	0.857	0.749	0.634	0.679	0.749	0.8	0.653	0.761
19.5	0.719	0.833	0.803	0.75	0.716	0.681	0.776	0.737	0.688	0.798	0.847	0.879	0.75	0.763	0.674	0.864	0.862	0.757	0.644	0.679	0.723	0.812	0.654	0.75
20	0.708	0.844	0.803	0.74	0.725	0.68	0.771	0.741	0.692	0.807	0.849	0.883	0.763	0.76	0.68	0.865	0.866	0.758	0.65	0.686	0.737	0.824	0.656	0.753

## Sheet: pCR2 pCR2-ermB BHI
Time (Hrs)	V583 pCR2									V583 pCR2-ermB									V649 pCR2									V649 pCR2-ermB
0	0.003	0.003	0.002	0	0.005	0.001	0.002	0.003	0.002	0.002	0.004	0.059	0.002	0.004	0.005	0.001	0.007	0.001	0.007	0.003	0.004	0.001	0.002	0.006	0.004	0.001	0.005	0.003	0.004	0.003	0.004	0.006	0.004	-0.004	0.002	0.001
0.5	0.003	0.003	0.002	0	0.004	0.001	0.002	0.003	0.002	0.003	0.004	0.058	0.002	0.003	0.005	0.001	0.007	0.002	0.006	0.003	0.004	0.001	0.002	0.006	0.004	0.001	0.004	0.003	0.004	0.004	0.004	0.005	0.004	-0.003	0.001	0.001
1	0.003	0.003	0.002	0	0.004	0.001	0.002	0.002	0.002	0.003	0.004	0.079	0.002	0.003	0.006	0.001	0.007	0.003	0.006	0.004	0.004	0.001	0.002	0.006	0.003	0.001	0.005	0.003	0.003	0.003	0.004	0.004	0.003	-0.003	0.001	0.001
1.5	0.003	0.003	0.002	0.001	0.004	0.002	0.002	0.002	0.003	0.003	0.005	0.099	0.003	0.01	0.028	0.001	0.013	0.025	0.006	0.007	0.026	0.001	0.02	0.013	0.004	0.008	0.031	0.003	0.013	0.024	0.004	0.004	0.003	-0.003	0.001	0.002
2	0.005	0.005	0.004	0.003	0.006	0.003	0.003	0.004	0.005	0.004	0.02	0.104	0.003	0.024	0.045	0.003	0.03	0.042	0.007	0.022	0.042	0.001	0.035	0.028	0.004	0.022	0.048	0.003	0.024	0.042	0.005	0.005	0.004	-0.003	0.002	0.002
2.5	0.009	0.009	0.008	0.008	0.012	0.008	0.006	0.007	0.009	0.007	0.035	0.11	0.004	0.037	0.064	0.006	0.044	0.059	0.009	0.035	0.057	0.002	0.049	0.041	0.005	0.032	0.063	0.005	0.034	0.056	0.006	0.007	0.006	-0.001	0.003	0.003
3	0.021	0.019	0.017	0.019	0.023	0.018	0.013	0.015	0.016	0.016	0.052	0.125	0.007	0.05	0.076	0.012	0.062	0.075	0.013	0.05	0.073	0.005	0.061	0.055	0.008	0.045	0.076	0.01	0.047	0.071	0.011	0.011	0.01	0.002	0.005	0.005
3.5	0.046	0.038	0.036	0.042	0.047	0.038	0.028	0.032	0.031	0.034	0.074	0.143	0.016	0.067	0.097	0.026	0.087	0.098	0.024	0.071	0.093	0.011	0.076	0.069	0.017	0.059	0.09	0.022	0.065	0.091	0.023	0.024	0.019	0.013	0.01	0.012
4	0.094	0.078	0.071	0.085	0.091	0.076	0.055	0.064	0.059	0.065	0.11	0.173	0.031	0.088	0.124	0.051	0.117	0.128	0.044	0.098	0.118	0.024	0.094	0.086	0.034	0.075	0.11	0.047	0.086	0.111	0.043	0.046	0.035	0.034	0.022	0.026
4.5	0.177	0.151	0.131	0.159	0.171	0.139	0.106	0.125	0.114	0.122	0.169	0.224	0.059	0.122	0.164	0.096	0.171	0.178	0.08	0.145	0.158	0.049	0.122	0.11	0.066	0.104	0.139	0.098	0.122	0.142	0.082	0.095	0.066	0.076	0.044	0.056
5	0.296	0.259	0.221	0.254	0.274	0.225	0.185	0.219	0.199	0.208	0.258	0.297	0.111	0.181	0.234	0.168	0.257	0.256	0.139	0.22	0.215	0.094	0.165	0.149	0.125	0.15	0.181	0.19	0.18	0.193	0.146	0.178	0.118	0.157	0.087	0.112
5.5	0.412	0.371	0.321	0.346	0.367	0.309	0.275	0.322	0.292	0.302	0.36	0.385	0.185	0.265	0.325	0.253	0.358	0.347	0.215	0.315	0.291	0.165	0.227	0.203	0.219	0.217	0.243	0.313	0.264	0.269	0.234	0.283	0.195	0.287	0.157	0.201
6	0.497	0.457	0.403	0.421	0.441	0.373	0.353	0.406	0.362	0.382	0.445	0.463	0.269	0.358	0.418	0.324	0.443	0.425	0.296	0.407	0.373	0.255	0.309	0.28	0.322	0.302	0.327	0.426	0.362	0.359	0.324	0.373	0.278	0.418	0.254	0.307
6.5	0.585	0.554	0.503	0.492	0.512	0.439	0.42	0.488	0.419	0.455	0.516	0.53	0.34	0.434	0.491	0.381	0.509	0.487	0.359	0.482	0.454	0.345	0.393	0.37	0.411	0.388	0.415	0.537	0.435	0.436	0.399	0.449	0.342	0.512	0.346	0.395
7	0.636	0.625	0.583	0.56	0.567	0.508	0.499	0.542	0.476	0.514	0.57	0.596	0.4	0.501	0.557	0.439	0.556	0.546	0.426	0.557	0.52	0.42	0.463	0.436	0.479	0.452	0.483	0.571	0.488	0.486	0.46	0.493	0.387	0.622	0.43	0.486
7.5	0.664	0.666	0.64	0.61	0.604	0.547	0.55	0.572	0.501	0.556	0.603	0.637	0.454	0.552	0.608	0.482	0.588	0.587	0.48	0.614	0.579	0.504	0.53	0.502	0.563	0.514	0.569	0.594	0.524	0.519	0.49	0.521	0.413	0.651	0.494	0.533
8	0.734	0.694	0.695	0.639	0.63	0.587	0.598	0.603	0.535	0.601	0.632	0.666	0.482	0.576	0.64	0.539	0.622	0.627	0.514	0.659	0.618	0.546	0.577	0.547	0.596	0.553	0.636	0.625	0.557	0.546	0.522	0.546	0.441	0.673	0.526	0.558
8.5	0.74	0.715	0.712	0.644	0.642	0.605	0.634	0.625	0.565	0.629	0.662	0.696	0.512	0.612	0.679	0.575	0.665	0.658	0.562	0.694	0.659	0.576	0.609	0.581	0.629	0.586	0.68	0.647	0.585	0.576	0.554	0.568	0.469	0.7	0.562	0.59
9	0.778	0.734	0.724	0.651	0.635	0.61	0.654	0.611	0.569	0.636	0.677	0.722	0.54	0.653	0.711	0.576	0.682	0.676	0.596	0.717	0.689	0.607	0.648	0.615	0.652	0.622	0.724	0.656	0.613	0.602	0.569	0.572	0.488	0.742	0.596	0.627
9.5	0.782	0.732	0.735	0.663	0.631	0.609	0.659	0.605	0.563	0.642	0.686	0.736	0.56	0.666	0.735	0.591	0.703	0.695	0.601	0.719	0.71	0.605	0.68	0.642	0.656	0.644	0.748	0.659	0.635	0.617	0.579	0.573	0.502	0.768	0.628	0.657
10	0.824	0.756	0.768	0.682	0.631	0.616	0.658	0.599	0.572	0.637	0.692	0.744	0.575	0.683	0.745	0.599	0.708	0.699	0.606	0.721	0.724	0.589	0.702	0.664	0.643	0.659	0.764	0.656	0.651	0.637	0.59	0.57	0.516	0.762	0.643	0.684
10.5	0.829	0.745	0.8	0.683	0.634	0.621	0.649	0.6	0.57	0.644	0.696	0.757	0.592	0.681	0.756	0.6	0.716	0.712	0.614	0.726	0.74	0.597	0.721	0.68	0.635	0.666	0.781	0.653	0.663	0.65	0.597	0.567	0.527	0.727	0.674	0.706
11	0.845	0.786	0.819	0.686	0.638	0.631	0.652	0.599	0.569	0.655	0.704	0.766	0.592	0.684	0.762	0.61	0.729	0.721	0.626	0.739	0.752	0.596	0.731	0.694	0.632	0.671	0.794	0.649	0.668	0.663	0.602	0.56	0.537	0.751	0.697	0.729
11.5	0.833	0.804	0.836	0.703	0.643	0.643	0.659	0.605	0.577	0.655	0.71	0.782	0.596	0.686	0.77	0.625	0.743	0.735	0.631	0.748	0.762	0.599	0.751	0.699	0.632	0.677	0.799	0.642	0.675	0.67	0.611	0.554	0.546	0.739	0.724	0.745
12	0.859	0.824	0.845	0.729	0.647	0.654	0.672	0.611	0.585	0.658	0.719	0.793	0.604	0.687	0.777	0.636	0.756	0.751	0.648	0.764	0.776	0.609	0.763	0.716	0.647	0.689	0.821	0.638	0.677	0.676	0.617	0.549	0.554	0.744	0.746	0.763
12.5	0.848	0.82	0.858	0.726	0.662	0.665	0.695	0.623	0.597	0.684	0.729	0.806	0.617	0.696	0.787	0.653	0.776	0.764	0.669	0.779	0.795	0.614	0.784	0.732	0.66	0.702	0.843	0.636	0.682	0.684	0.626	0.546	0.562	0.737	0.763	0.765
13	0.846	0.818	0.866	0.737	0.673	0.678	0.709	0.63	0.606	0.699	0.74	0.817	0.624	0.71	0.797	0.673	0.791	0.777	0.672	0.787	0.806	0.622	0.8	0.746	0.662	0.716	0.846	0.641	0.69	0.69	0.632	0.545	0.57	0.736	0.812	0.747
13.5	0.867	0.85	0.879	0.752	0.686	0.685	0.74	0.638	0.614	0.712	0.751	0.827	0.633	0.719	0.812	0.683	0.804	0.787	0.664	0.799	0.818	0.638	0.817	0.757	0.682	0.732	0.854	0.658	0.7	0.703	0.652	0.548	0.584	0.714	0.831	0.792
14	0.86	0.862	0.892	0.76	0.698	0.694	0.754	0.646	0.619	0.712	0.759	0.833	0.639	0.73	0.826	0.684	0.817	0.798	0.665	0.812	0.827	0.655	0.824	0.764	0.692	0.742	0.883	0.664	0.709	0.716	0.662	0.553	0.595	0.728	0.863	0.805
14.5	0.845	0.878	0.9	0.769	0.694	0.701	0.763	0.652	0.626	0.719	0.764	0.842	0.648	0.739	0.832	0.687	0.826	0.802	0.676	0.813	0.828	0.666	0.827	0.776	0.701	0.751	0.869	0.67	0.725	0.732	0.661	0.556	0.601	0.728	0.865	0.823
15	0.858	0.886	0.915	0.782	0.696	0.715	0.754	0.659	0.634	0.717	0.772	0.853	0.657	0.746	0.84	0.716	0.833	0.809	0.691	0.818	0.828	0.681	0.838	0.786	0.711	0.765	0.878	0.684	0.736	0.742	0.665	0.559	0.609	0.676	0.862	0.813
15.5	0.837	0.881	0.912	0.774	0.707	0.719	0.781	0.661	0.634	0.716	0.781	0.855	0.66	0.755	0.844	0.715	0.837	0.811	0.685	0.815	0.838	0.67	0.846	0.791	0.72	0.773	0.89	0.691	0.745	0.748	0.673	0.566	0.612	0.692	0.853	0.783
16	0.842	0.889	0.903	0.784	0.698	0.714	0.781	0.667	0.636	0.735	0.782	0.855	0.667	0.762	0.847	0.709	0.842	0.814	0.698	0.832	0.848	0.68	0.842	0.799	0.714	0.776	0.897	0.694	0.749	0.758	0.667	0.566	0.61	0.655	0.819	0.742
16.5	0.826	0.876	0.903	0.774	0.704	0.719	0.784	0.666	0.64	0.738	0.784	0.854	0.667	0.767	0.848	0.712	0.846	0.816	0.697	0.837	0.855	0.69	0.86	0.806	0.718	0.778	0.894	0.7	0.758	0.764	0.675	0.569	0.61	0.668	0.802	0.75
17	0.813	0.88	0.896	0.797	0.705	0.73	0.79	0.671	0.641	0.749	0.782	0.868	0.682	0.773	0.85	0.707	0.851	0.817	0.691	0.852	0.858	0.684	0.861	0.814	0.72	0.785	0.901	0.701	0.762	0.769	0.676	0.571	0.612	0.629	0.789	0.738
17.5	0.783	0.834	0.873	0.792	0.712	0.725	0.774	0.675	0.646	0.748	0.786	0.874	0.691	0.78	0.851	0.726	0.86	0.824	0.703	0.863	0.862	0.702	0.866	0.817	0.731	0.793	0.899	0.71	0.768	0.774	0.685	0.57	0.612	0.63	0.741	0.717
18	0.77	0.833	0.888	0.81	0.719	0.73	0.782	0.676	0.646	0.749	0.79	0.874	0.688	0.784	0.855	0.733	0.864	0.829	0.711	0.861	0.867	0.711	0.863	0.823	0.737	0.797	0.905	0.716	0.772	0.775	0.684	0.573	0.61	0.615	0.718	0.711
18.5	0.764	0.804	0.865	0.809	0.721	0.734	0.794	0.674	0.648	0.749	0.79	0.873	0.71	0.789	0.853	0.733	0.87	0.825	0.721	0.862	0.867	0.704	0.872	0.82	0.74	0.795	0.881	0.725	0.778	0.779	0.685	0.577	0.609	0.607	0.703	0.702
19	0.747	0.804	0.861	0.814	0.724	0.727	0.804	0.678	0.65	0.752	0.794	0.878	0.712	0.792	0.862	0.737	0.876	0.837	0.732	0.864	0.874	0.697	0.868	0.823	0.732	0.796	0.892	0.722	0.778	0.781	0.686	0.582	0.608	0.588	0.683	0.682
19.5	0.73	0.768	0.841	0.821	0.73	0.74	0.795	0.681	0.653	0.75	0.799	0.883	0.715	0.799	0.863	0.746	0.879	0.84	0.729	0.872	0.875	0.696	0.879	0.83	0.742	0.803	0.912	0.728	0.783	0.787	0.683	0.585	0.611	0.574	0.692	0.677
20	0.729	0.746	0.841	0.824	0.729	0.744	0.791	0.683	0.655	0.758	0.801	0.887	0.712	0.798	0.866	0.749	0.883	0.841	0.74	0.871	0.873	0.698	0.879	0.832	0.722	0.81	0.912	0.725	0.782	0.787	0.696	0.588	0.615	0.579	0.676	0.677

## Sheet: pCR2 pCR2-ermB +cam
Time (Hrs)	V583 pCR2									V583 pCR2-ermB									V649 pCR2									V649 pCR2-ermB
0	0.001	0.001	0	0.001	0.002	0.002	0.003	0.002	0.002	0.003	0.003	0.001	0.001	0.003	0.002	-0.002	0	0.001	0	0.002	0.002	0.004	0.001	0.007	0.002	0.004	0.005	0.001	0.002	0.001	0.003	0.002	0.002	0.002	0.003	0.003
0.5	0.001	0.001	0	0.001	0.003	0.002	0.003	0.002	0.002	0.004	0.003	0.001	0.002	0.003	0.002	-0.002	0	0.001	0	0.002	0.002	0.003	0.001	0.006	0.002	0.004	0.005	0.001	0.003	0.001	0.003	0.002	0.002	0.002	0.002	0.003
1	0.001	0.001	0	0.001	0.003	0.002	0.003	0.002	0.002	0.006	0.004	0.001	0.003	0.005	0.002	-0.001	0.001	0.001	0.001	0.003	0.002	0.004	0.002	0.005	0.003	0.005	0.006	0.002	0.004	0.001	0.003	0.002	0.002	0.002	0.003	0.005
1.5	0.002	0.001	0.001	0.001	0.003	0.003	0.004	0.003	0.003	0.017	0.005	0.001	0.025	0.02	0.003	0.019	0.002	0.002	0.011	0.005	0.003	0.013	0.003	0.006	0.019	0.007	0.007	0.021	0.005	0.002	0.003	0.002	0.002	0.002	0.003	0.003
2	0.003	0.002	0.002	0.002	0.004	0.004	0.005	0.004	0.003	0.035	0.013	0.002	0.04	0.035	0.003	0.036	0.01	0.004	0.029	0.01	0.003	0.031	0.011	0.006	0.035	0.024	0.007	0.035	0.015	0.002	0.003	0.002	0.002	0.002	0.004	0.003
2.5	0.006	0.004	0.005	0.005	0.007	0.006	0.007	0.006	0.005	0.05	0.025	0.004	0.053	0.046	0.005	0.052	0.022	0.006	0.044	0.022	0.004	0.046	0.022	0.007	0.049	0.04	0.008	0.048	0.028	0.002	0.004	0.002	0.002	0.002	0.005	0.006
3	0.013	0.011	0.012	0.011	0.013	0.012	0.011	0.009	0.008	0.065	0.038	0.008	0.066	0.057	0.007	0.069	0.035	0.011	0.059	0.037	0.008	0.059	0.033	0.009	0.061	0.055	0.009	0.059	0.037	0.002	0.004	0.002	0.002	0.002	0.005	0.005
3.5	0.03	0.025	0.027	0.023	0.027	0.023	0.02	0.018	0.016	0.084	0.056	0.017	0.079	0.075	0.014	0.095	0.055	0.022	0.078	0.053	0.016	0.072	0.046	0.013	0.074	0.071	0.013	0.069	0.051	0.003	0.004	0.003	0.003	0.003	0.006	0.006
4	0.06	0.05	0.056	0.047	0.053	0.043	0.034	0.033	0.03	0.108	0.079	0.032	0.095	0.096	0.025	0.132	0.078	0.041	0.099	0.076	0.031	0.09	0.062	0.02	0.091	0.087	0.021	0.079	0.06	0.002	0.004	0.002	0.003	0.002	0.005	0.005
4.5	0.121	0.099	0.112	0.093	0.103	0.083	0.064	0.062	0.056	0.147	0.118	0.061	0.119	0.125	0.047	0.19	0.118	0.081	0.13	0.107	0.061	0.112	0.084	0.037	0.114	0.108	0.036	0.088	0.072	0.003	0.004	0.003	0.003	0.003	0.006	0.006
5	0.215	0.176	0.204	0.171	0.183	0.152	0.118	0.115	0.105	0.208	0.184	0.115	0.157	0.171	0.086	0.281	0.179	0.149	0.174	0.155	0.116	0.143	0.112	0.063	0.146	0.139	0.065	0.099	0.081	0.004	0.005	0.003	0.003	0.004	0.006	0.011
5.5	0.322	0.273	0.312	0.262	0.281	0.236	0.193	0.19	0.175	0.289	0.267	0.188	0.213	0.242	0.145	0.383	0.262	0.233	0.241	0.229	0.199	0.193	0.158	0.112	0.199	0.184	0.116	0.109	0.089	0.005	0.006	0.005	0.004	0.005	0.007	0.009
6	0.435	0.361	0.407	0.339	0.365	0.306	0.271	0.268	0.25	0.372	0.351	0.264	0.288	0.324	0.222	0.471	0.351	0.308	0.325	0.321	0.295	0.258	0.223	0.184	0.273	0.255	0.19	0.118	0.105	0.007	0.008	0.007	0.005	0.008	0.01	0.011
6.5	0.529	0.437	0.499	0.407	0.421	0.365	0.34	0.327	0.313	0.442	0.418	0.326	0.364	0.406	0.296	0.563	0.429	0.36	0.401	0.411	0.38	0.338	0.3	0.268	0.362	0.335	0.272	0.131	0.116	0.013	0.013	0.012	0.009	0.013	0.015	0.016
7	0.6	0.513	0.566	0.467	0.479	0.418	0.422	0.381	0.37	0.507	0.481	0.382	0.425	0.476	0.357	0.64	0.497	0.415	0.47	0.488	0.461	0.416	0.381	0.354	0.446	0.418	0.344	0.145	0.126	0.02	0.019	0.02	0.015	0.022	0.023	0.025
7.5	0.65	0.567	0.607	0.513	0.522	0.472	0.478	0.434	0.41	0.56	0.526	0.423	0.486	0.548	0.425	0.69	0.554	0.461	0.528	0.564	0.526	0.509	0.451	0.432	0.516	0.498	0.418	0.162	0.143	0.033	0.03	0.032	0.024	0.034	0.036	0.041
8	0.685	0.621	0.642	0.543	0.54	0.495	0.518	0.472	0.447	0.595	0.574	0.457	0.541	0.6	0.467	0.724	0.604	0.489	0.57	0.612	0.563	0.606	0.523	0.509	0.59	0.56	0.479	0.181	0.165	0.053	0.045	0.051	0.04	0.053	0.056	0.067
8.5	0.717	0.671	0.683	0.545	0.55	0.513	0.536	0.512	0.484	0.637	0.607	0.485	0.589	0.638	0.505	0.748	0.625	0.533	0.609	0.642	0.596	0.671	0.581	0.559	0.636	0.612	0.529	0.206	0.193	0.08	0.063	0.076	0.063	0.076	0.085	0.101
9	0.724	0.692	0.708	0.548	0.54	0.516	0.527	0.527	0.502	0.663	0.636	0.502	0.634	0.675	0.549	0.745	0.623	0.544	0.645	0.661	0.6	0.717	0.632	0.591	0.664	0.63	0.558	0.239	0.233	0.118	0.088	0.11	0.093	0.105	0.124	0.146
9.5	0.748	0.715	0.752	0.561	0.543	0.528	0.529	0.53	0.525	0.676	0.641	0.517	0.664	0.689	0.564	0.748	0.632	0.558	0.674	0.669	0.587	0.752	0.669	0.606	0.676	0.646	0.581	0.272	0.273	0.169	0.122	0.157	0.131	0.143	0.178	0.198
10	0.735	0.735	0.766	0.57	0.526	0.535	0.532	0.53	0.526	0.687	0.651	0.535	0.681	0.689	0.576	0.758	0.631	0.563	0.693	0.673	0.585	0.761	0.681	0.603	0.676	0.67	0.594	0.32	0.334	0.23	0.167	0.214	0.176	0.196	0.24	0.281
10.5	0.782	0.759	0.791	0.589	0.53	0.549	0.538	0.536	0.53	0.696	0.65	0.543	0.687	0.697	0.584	0.78	0.632	0.564	0.714	0.691	0.593	0.777	0.705	0.595	0.684	0.667	0.606	0.373	0.386	0.301	0.221	0.28	0.234	0.258	0.322	0.35
11	0.81	0.769	0.81	0.603	0.531	0.561	0.55	0.554	0.54	0.714	0.658	0.546	0.694	0.696	0.591	0.796	0.639	0.574	0.74	0.703	0.606	0.793	0.727	0.597	0.698	0.676	0.623	0.433	0.451	0.363	0.273	0.341	0.305	0.351	0.403	0.436
11.5	0.844	0.803	0.846	0.618	0.538	0.58	0.565	0.565	0.547	0.731	0.676	0.556	0.716	0.705	0.6	0.813	0.649	0.594	0.765	0.717	0.62	0.81	0.741	0.601	0.723	0.697	0.641	0.484	0.509	0.403	0.313	0.388	0.365	0.458	0.465	0.489
12	0.854	0.819	0.866	0.633	0.535	0.598	0.578	0.578	0.557	0.744	0.689	0.573	0.737	0.72	0.613	0.823	0.665	0.601	0.791	0.736	0.636	0.836	0.759	0.611	0.738	0.711	0.654	0.517	0.554	0.423	0.344	0.413	0.403	0.5	0.502	0.57
12.5	0.858	0.848	0.881	0.651	0.538	0.607	0.591	0.592	0.575	0.762	0.706	0.584	0.76	0.735	0.632	0.848	0.683	0.618	0.807	0.755	0.65	0.862	0.786	0.629	0.771	0.729	0.67	0.538	0.567	0.418	0.36	0.41	0.417	0.521	0.622	0.554
13	0.879	0.872	0.896	0.657	0.556	0.617	0.6	0.602	0.581	0.778	0.718	0.593	0.772	0.752	0.641	0.854	0.694	0.629	0.818	0.769	0.663	0.874	0.805	0.637	0.775	0.744	0.679	0.542	0.584	0.411	0.37	0.4	0.412	0.54	0.592	0.475
13.5	0.876	0.904	0.919	0.67	0.575	0.623	0.612	0.612	0.588	0.792	0.732	0.6	0.792	0.774	0.655	0.87	0.7	0.64	0.831	0.782	0.674	0.883	0.822	0.653	0.8	0.76	0.688	0.553	0.588	0.407	0.382	0.395	0.402	0.52	0.603	0.544
14	0.874	0.908	0.945	0.677	0.589	0.627	0.62	0.618	0.596	0.804	0.741	0.611	0.805	0.784	0.658	0.883	0.71	0.643	0.834	0.795	0.682	0.894	0.831	0.662	0.803	0.766	0.688	0.569	0.589	0.404	0.394	0.387	0.393	0.477	0.566	0.592
14.5	0.906	0.928	0.963	0.679	0.603	0.631	0.624	0.623	0.6	0.812	0.746	0.616	0.814	0.796	0.662	0.885	0.709	0.642	0.839	0.802	0.686	0.904	0.841	0.667	0.806	0.782	0.695	0.574	0.596	0.4	0.4	0.384	0.37	0.535	0.572	0.668
15	0.893	0.94	0.978	0.684	0.614	0.639	0.628	0.625	0.604	0.823	0.755	0.621	0.824	0.808	0.672	0.892	0.715	0.647	0.855	0.812	0.696	0.911	0.846	0.677	0.816	0.785	0.702	0.581	0.6	0.403	0.4	0.379	0.353	0.62	0.601	0.658
15.5	0.889	0.964	0.987	0.692	0.621	0.644	0.633	0.629	0.609	0.827	0.76	0.625	0.827	0.819	0.674	0.897	0.715	0.651	0.861	0.818	0.696	0.907	0.865	0.685	0.822	0.79	0.708	0.58	0.606	0.397	0.405	0.378	0.35	0.629	0.518	0.627
16	0.906	0.983	0.979	0.694	0.617	0.646	0.632	0.636	0.611	0.83	0.766	0.627	0.836	0.823	0.677	0.9	0.714	0.653	0.86	0.824	0.703	0.912	0.857	0.691	0.828	0.792	0.717	0.582	0.62	0.391	0.413	0.384	0.362	0.649	0.539	0.563
16.5	0.908	0.991	1.008	0.691	0.617	0.656	0.637	0.634	0.607	0.832	0.768	0.63	0.839	0.83	0.685	0.905	0.718	0.659	0.856	0.824	0.706	0.924	0.858	0.691	0.837	0.796	0.724	0.59	0.636	0.396	0.418	0.387	0.377	0.509	0.526	0.538
17	0.903	1.009	0.99	0.708	0.609	0.663	0.638	0.635	0.604	0.834	0.775	0.632	0.84	0.83	0.682	0.912	0.722	0.664	0.861	0.829	0.701	0.928	0.86	0.697	0.829	0.792	0.728	0.612	0.65	0.401	0.425	0.389	0.385	0.483	0.469	0.541
17.5	0.872	1.008	0.984	0.72	0.615	0.673	0.643	0.639	0.602	0.84	0.782	0.638	0.845	0.837	0.691	0.922	0.727	0.671	0.863	0.836	0.707	0.935	0.863	0.706	0.835	0.8	0.737	0.607	0.659	0.402	0.43	0.398	0.386	0.509	0.542	0.531
18	0.87	1.016	0.991	0.714	0.613	0.679	0.644	0.64	0.611	0.842	0.784	0.639	0.847	0.836	0.688	0.918	0.73	0.674	0.866	0.838	0.719	0.931	0.861	0.706	0.835	0.808	0.739	0.616	0.669	0.412	0.434	0.411	0.381	0.459	0.463	0.5
18.5	0.85	1.026	0.977	0.724	0.614	0.687	0.65	0.639	0.623	0.846	0.789	0.641	0.848	0.841	0.692	0.921	0.735	0.68	0.869	0.845	0.719	0.945	0.862	0.705	0.84	0.814	0.74	0.623	0.68	0.43	0.439	0.413	0.392	0.404	0.436	0.512
19	0.847	1.023	0.978	0.727	0.618	0.691	0.653	0.642	0.632	0.852	0.793	0.641	0.852	0.846	0.69	0.933	0.734	0.679	0.876	0.851	0.722	0.947	0.866	0.705	0.852	0.819	0.749	0.622	0.691	0.4	0.447	0.421	0.413	0.432	0.437	0.456
19.5	0.845	1.023	0.984	0.728	0.623	0.698	0.654	0.647	0.639	0.858	0.797	0.645	0.856	0.852	0.697	0.944	0.742	0.688	0.878	0.855	0.722	0.954	0.868	0.709	0.854	0.821	0.747	0.643	0.695	0.419	0.46	0.437	0.417	0.42	0.402	0.466
20	0.82	1.037	0.987	0.728	0.627	0.705	0.656	0.649	0.645	0.862	0.8	0.644	0.861	0.856	0.698	0.952	0.745	0.69	0.887	0.856	0.726	0.957	0.867	0.703	0.862	0.823	0.746	0.66	0.709	0.449	0.475	0.451	0.455	0.37	0.394	0.453
